# Supplementary material for: Time-series reconstruction of the molecular architecture of human centriole assembly
Source: PubMed Central journal article supplement — Cell. 2024 Apr 25;187(9):2158–2174.e19. doi: 10.1016/j.cell.2024.03.025 (PMC11060037; doi:10.1016/j.cell.2024.03.025), 2024-04-25
Supplement: mmc1.pdf [file mmc1.pdf]

**Cell, Volume 187**

**Supplemental information**

**Time-series reconstruction of the molecular  
architecture of human centriole assembly**

**Marine H. Laporte, Davide Gambarotto, Éloïse Bertiaux, Lorène Bournonville, Vincent Louvel, José M. Nunes, Susanne Borgers, Virginie Hamel, and Paul Guichard**

**Table S1. List of the protein region targeted by the antibodies used in this study, related to STAR Methods**

| <b>Antibody</b>                                              | <b>Dilution</b> | <b>Targeted region of the protein</b>       |
|--------------------------------------------------------------|-----------------|---------------------------------------------|
| $\alpha$ -alpha-tubulin (ab18251, Abcam)                     | 1:500           | Full-length human alpha-tubulin             |
| $\alpha$ -alpha-tubulin (AA345, abcd antibodies)             | 1:250           | Full-length human alpha-tubulin             |
| $\alpha$ -beta-tubulin (AA344, abcd antibodies)              | 1:250           | Full-length human beta-tubulin              |
| $\alpha$ -acetylated-tubulin (32-2700, ThermoFisher)         | 1:250           | Full-length Sea Urchin acetylated-tubulin   |
| $\alpha$ -gamma-tubulin (ab11316, abcam)                     | 1:250           | AA 38-53 of gamma-tubulin                   |
| $\alpha$ -gamma-tubulin (gift from A-M Tassin) <sup>91</sup> | 1:250           | Full-length human gamma-tubulin             |
| $\alpha$ -Centrin (04-1624, Merk Millipore, clone 20H5)      | 1:250           | Cter region of <i>Chlamydomonas</i> Centrin |
| $\alpha$ -C2CD3 (HPA038552, Atlas antibodies)                | 1:250           | AA 2122-2205 of human C2CD3                 |
| $\alpha$ -CCDC77 (26369-1-AP, Proteintech)                   | 1:250           | AA 215-488 of human CCDC77                  |
| $\alpha$ -CEP44 (24457-1-AP, Proteintech)                    | 1:250           | AA 1-350 of human CEP44                     |
| $\alpha$ -CEP63 (16268-1-AP, Proteintech)                    | 1:500           | AA 1-350 of human CEP63                     |
| $\alpha$ -CEP63 (06-1292, Merk Milipore)                     | 1:500           | Full-length human CEP63                     |
| $\alpha$ -CEP97 (22050, Proteintech)                         | 1:250           | AA 506-865 of human CEP97                   |
| $\alpha$ -CEP135 (24428-AP, Proteintech)                     | 1:250           | AA 1-233 of human CEP135                    |
| $\alpha$ -CEP152 (A302-479A, Bethyl)                         | 1:250           | AA 50-100 of human CEP152                   |
| $\alpha$ -CEP162 (HPA030173, Atlas antibodies)               | 1:250           | AA 755-859 of human CEP162                  |
| $\alpha$ -CEP164 (22227-1-AP, Proteintech)                   | 1:500           | AA 1-112 of human CEP164                    |
| $\alpha$ -CEP290 (PA5 84641, Invitrogen)                     | 1:500           | AA 675-777 of human CEP290                  |
| $\alpha$ -CEP295 (HPA038596, Sigma)                          | 1:100           | AA 1877-1978 of human CEP295                |
| $\alpha$ -CP110 (12780-1-AP, Proteintech)                    | 1:500           | AA 1-337 of human CP110                     |
| $\alpha$ -CPAP (11517-1-AP, Proteintech)                     | 1:100           | AA 1033-1338 of human CPAP                  |
| $\alpha$ -FAM161A (Le Guennec et al., 2020) <sup>10</sup>    | 1:250           | AA 1-160 of human FAM161A                   |
| $\alpha$ -PLK4 (28750-1-AP, Proteintech)                     | 1:250           | AA 235-426 of human PLK4                    |
| $\alpha$ -POC1B (PA5-24495, Thermo Fisher)                   | 1:100           | AA 321-350 of human POC1B                   |
| $\alpha$ -hPOC5 (A303-341A, Bethyl)                          | 1:250           | AA 525-575 of human POC5                    |
| $\alpha$ -SAS-6 (sc-81431, Santa Cruz)                       | 1:250           | AA 404-657 of human SAS-6                   |
| $\alpha$ -SFI1 (13550-1-AP, Proteintech)                     | 1:250           | AA 917-1211 of human SFI1                   |
| $\alpha$ -SFI1 (Laporte et al., 2022) <sup>47</sup>          | 1:250           | AA 1021-1240 of human SFI1                  |
| $\alpha$ -SPICE (A303-272a, Bethyl)                          | 1:250           | AA 475-525 of human SPICE                   |
| $\alpha$ -STIL (A302-441A-T, Bethyl)                         | 1:250           | AA 450-500 of human STIL                    |
| $\alpha$ -WDR67 (HPA023710, Atlas antibodies)                | 1:250           | AA 617-716 of human WDR67                   |
